# Supplementary material for: Complex formation equilibria in the binary Zn2+–oxalate and In3+–oxalate systems
Source: Royal Society of Chemistry journal article supplement (doi:10.1039/b303202g), 2003-01-01
Supplement: b303202g-ts1.pdf [file b303202g-ts1.pdf]

| 1 M NaClO <sub>4</sub> |                                                                                                                                                                                                  |                  |                  |                  |                  |                    |                    |
|------------------------|--------------------------------------------------------------------------------------------------------------------------------------------------------------------------------------------------|------------------|------------------|------------------|------------------|--------------------|--------------------|
| Titration 1            | $V_0, \text{cm}^3$                                                                                                                                                                               | $H_0, \text{mM}$ | $B_0, \text{mM}$ | $H_T, \text{mM}$ | $A_T, \text{mM}$ | $E^0_g, \text{mV}$ | $E^0_b, \text{mV}$ |
|                        | 50.00                                                                                                                                                                                            | 9.819            | 0.9648           | 0.980            | 49.99            | 273.25             | -1107.32           |
| $V_T, E_h, E_b$        | 0.124, 85.94, -1197.19; 0.344, 83.19, -1198.82; 0.608, 80.02, -1200.76; 1.000, 73.85, -1204.44; 3.000, 47.61, -1222.52; 6.062, 25.05, -1241.35; 10.006, 11.23, -1254.88; 15.084, 2.09, -1264.85. |                  |                  |                  |                  |                    |                    |
| Titration 2            | $V_0, \text{cm}^3$                                                                                                                                                                               | $H_0, \text{mM}$ | $B_0, \text{mM}$ | $H_T, \text{mM}$ | $A_T, \text{mM}$ | $E^0_g, \text{mV}$ | $E^0_b, \text{mV}$ |
|                        | 50.00                                                                                                                                                                                            | 10.863           | 1.0923           | 0.980            | 49.99            | 277.57             | -1100.01           |
| $V_T, E_h, E_b$        | 0.118, 85.68, -1186.38; 0.320, 83.30, -1187.70; 0.600, 79.93, -1189.58; 1.016, 74.30, -1192.89; 3.014, 48.27, -1210.19; 6.016, 24.98, -1228.79; 10.026, 10.40, -1242.59; 15.004, 1.30, -1252.37. |                  |                  |                  |                  |                    |                    |
| Titration 3            | $V_0, \text{cm}^3$                                                                                                                                                                               | $H_0, \text{mM}$ | $B_0, \text{mM}$ | $H_T, \text{mM}$ | $A_T, \text{mM}$ | $E^0_g, \text{mV}$ | $E^0_b, \text{mV}$ |
|                        | 50.00                                                                                                                                                                                            | 0.849            | 2.029            | 0.980            | 49.99            | 277.71             | -1094.20           |
| $V_T, E_h, E_b$        | 0.126, 85.61, -1174.48; 0.330, 83.98, -1175.61; 0.618, 81.73, -1177.13; 1.046, 77.80, -1179.73; 3.026, 57.36, -1193.71; 6.028, 33.06, -1212.82; 10.094, 16.36, -1228.83; 15.014, 6.07, -1240.22. |                  |                  |                  |                  |                    |                    |

| 2 M NaClO <sub>4</sub> |                                                                                                                                                                                                                                                        |                  |                  |                  |                  |                    |                    |
|------------------------|--------------------------------------------------------------------------------------------------------------------------------------------------------------------------------------------------------------------------------------------------------|------------------|------------------|------------------|------------------|--------------------|--------------------|
| Titration 1            | $V_0, \text{cm}^3$                                                                                                                                                                                                                                     | $H_0, \text{mM}$ | $B_0, \text{mM}$ | $H_T, \text{mM}$ | $A_T, \text{mM}$ | $E^0_g, \text{mV}$ | $E^0_b, \text{mV}$ |
|                        | 50.00                                                                                                                                                                                                                                                  | 0.7260           | 0.7182           | 10.15            | 26.786           | 211.13             | -1169.31           |
| $V_T, E_h, E_b$        | 5.004,-1.46,-1279.48; 8.000,-14.85,-1290.55; 12.022,-26.16,-1301.41; 17.000,-34.50,-1310.68; 22.004,-39.85,-1317.18; 28.008,-44.28,-1322.72.                                                                                                           |                  |                  |                  |                  |                    |                    |
| Titration 2            | $V_0, \text{cm}^3$                                                                                                                                                                                                                                     | $H_0, \text{mM}$ | $B_0, \text{mM}$ | $H_T, \text{mM}$ | $A_T, \text{mM}$ | $E^0_g, \text{mV}$ | $E^0_b, \text{mV}$ |
|                        | 50.000                                                                                                                                                                                                                                                 | 0.8620           | 0.7370           | 1.025            | 20.396           | 213.89             | -1166.50           |
| $V_T, E_h, E_b$        | 0.528, 24.49, -1260.44; 1.008, 21.59, -1262.21; 2.566, 12.09, -1268.42; 4.056, 3.12, -1274.78; 6.060, -7.35, -1282.98; 9.036, -18.72, -1293.06; 13.048, -28.44, -1302.95; 20.000, -37.96, -1314.00; 28.994, -44.57, -1323.09; 40.000, -49.07, -1330.3. |                  |                  |                  |                  |                    |                    |
| Titration 3            | $V_0, \text{cm}^3$                                                                                                                                                                                                                                     | $H_0, \text{mM}$ | $B_0, \text{mM}$ | $H_T, \text{mM}$ | $A_T, \text{mM}$ | $E^0_g, \text{mV}$ | $E^0_b, \text{mV}$ |
|                        | 50.000                                                                                                                                                                                                                                                 | 0.9288           | 1.085            | 1.002            | 20.501           | 215.51             | -1163.90           |
| $V_T, E_h, E_b$        | 1.060, 20.70, -1251.57; 3.036, 10.93, -1258.54; 6.024, -3.12, -1269.33; 10.070, -17.71, -1282.47; 15.012, -28.67, -1294.15; 20.000, -35.27, -1301.84; 30.040, -42.88, -1312.25.                                                                        |                  |                  |                  |                  |                    |                    |

| 3 M NaClO <sub>4</sub> |                                                                                                                                                                                                                                                                                                                                     |                  |                  |                  |                  |                    |                    |
|------------------------|-------------------------------------------------------------------------------------------------------------------------------------------------------------------------------------------------------------------------------------------------------------------------------------------------------------------------------------|------------------|------------------|------------------|------------------|--------------------|--------------------|
| Titration 1            | $V_0, \text{cm}^3$                                                                                                                                                                                                                                                                                                                  | $H_0, \text{mM}$ | $B_0, \text{mM}$ | $H_T, \text{mM}$ | $A_T, \text{mM}$ | $E^0_g, \text{mV}$ | $E^0_b, \text{mV}$ |
|                        | 50.00                                                                                                                                                                                                                                                                                                                               | 1.888            | 1.2192           | 1.982            | 10.003           | 293.43             | -1082.33           |
| $V_T, E_h, E_b$        | 0.100,131.44,-1169.01; 0.304,131.08,-1169.26; 0.500,130.72,-1169.48; 1.002,129.81,-1170.05; 2.000,128.16,-1171.15; 3.004,126.30,-1172.35; 4.002,124.53,-1173.49; 5.500,121.76,-1175.26; 7.000,119.03,-1177.05; 9.000,115.09,-1179.75; 11.004,111.18,-1182.44; 14.000,105.33,-1186.68; 60.000,61.10,-1229.60; 80.000,55.87,-1235.20. |                  |                  |                  |                  |                    |                    |
| Titration 2            | $V_0, \text{cm}^3$                                                                                                                                                                                                                                                                                                                  | $H_0, \text{mM}$ | $B_0, \text{mM}$ | $H_T, \text{mM}$ | $A_T, \text{mM}$ | $E^0_g, \text{mV}$ | $E^0_b, \text{mV}$ |
|                        | 50.00                                                                                                                                                                                                                                                                                                                               | 1.8028           | 1.111            | 1.994            | 10.031           | 301.60             | -1084.42           |
| $V_T, E_h, E_b$        | 0.200,133.81,-1168.95; 0.504,132.96,-1169.24; 1.000,132.00,-1169.70; 2.002,129.49,-1171.17; 3.000,127.51,-1172.40; 4.002,125.62,-1173.62; 5.000,123.59,-1174.94; 6.502,120.68,-1176.83; 8.046,117.51,-1178.95; 10.000,113.66,-1181.63; 12.002,109.59,-1184.52; 15.054,103.24,-1189.16; 20.000,94.13,-1196.62.                       |                  |                  |                  |                  |                    |                    |
| Titration 3            | $V_0, \text{cm}^3$                                                                                                                                                                                                                                                                                                                  | $H_0, \text{mM}$ | $B_0, \text{mM}$ | $H_T, \text{mM}$ | $A_T, \text{mM}$ | $E^0_g, \text{mV}$ | $E^0_b, \text{mV}$ |
|                        | 60.00                                                                                                                                                                                                                                                                                                                               | 1.362            | 3.303            | 10.140           | 15.04            | 297.80             | -1075.47           |
| $V_T, E_h, E_b$        | 0.200,119.7,-1148.3; 0.500,120.4,-1148.7; 1.000,121.3,-1149.1; 2.006,122.9,-1150.0; 3.000,124.2,-1151.0; 5.002,126.1,-1152.8; 7.000,126.8,-1154.5.                                                                                                                                                                                  |                  |                  |                  |                  |                    |                    |
| Titration 4            | $V_0, \text{cm}^3$                                                                                                                                                                                                                                                                                                                  | $H_0, \text{mM}$ | $B_0, \text{mM}$ | $H_T, \text{mM}$ | $A_T, \text{mM}$ | $E^0_g, \text{mV}$ | $E^0_b, \text{mV}$ |
|                        | 50.00                                                                                                                                                                                                                                                                                                                               | 0.066            | 0.9386           | 1.025            | 9.998            | 303.46             | -1080.01           |
| $V_T, E_h, E_b$        | 0.200,9.94,-1169.83; 0.502,18.64,-1170.79; 1.000,32.87,-1172.04; 2.022,46.32,-1174.78; 3.002,52.00,-1177.36; 5.002,56.67,-1182.70; 8.002,56.99,-1190.33; 12.000,54.76,-1199.32; 18.068,51.30,-1209.75; 26.078,48.24,-1219.38; 36.106,45.94,-1227.35; 50.026,44.00,-1234.64; 70.026,42.60,-1238.95.                                  |                  |                  |                  |                  |                    |                    |
