# Supplementary material for: Complex formation equilibria in the binary Zn2+–oxalate and In3+–oxalate systems
Source: Royal Society of Chemistry journal article supplement (doi:10.1039/b303202g), 2003-01-01
Supplement: b303202g-ts2.pdf [file b303202g-ts2.pdf]

| 1 M NaClO <sub>4</sub> |                                                                                                                                                                                                                                                                          |                  |                  |                  |                  |                      |                      |
|------------------------|--------------------------------------------------------------------------------------------------------------------------------------------------------------------------------------------------------------------------------------------------------------------------|------------------|------------------|------------------|------------------|----------------------|----------------------|
| Titration 1            | $V_0, \text{cm}^3$                                                                                                                                                                                                                                                       | $H_0, \text{mM}$ | $B_0, \text{mM}$ | $H_T, \text{mM}$ | $A_T, \text{mM}$ | $E_{g}^0, \text{mV}$ | $E_{b}^0, \text{mV}$ |
|                        | 60.002                                                                                                                                                                                                                                                                   | 10.020           | 1.298            | 10.010           | 49.99            | 276.37               | -622.45              |
| $V_T, E_h, E_b$        | 0.102, 158.09, -680.6; 0.300, 157.75, -681.8; 0.600, 157.61, -683.5;<br>1.002, 157.43, -686.4; 3.002, 156.22, -705.2; 6.002, 151.06, -732.0;<br>30.026, 82.16, -819.8.                                                                                                   |                  |                  |                  |                  |                      |                      |
| Titration 2            | $V_0, \text{cm}^3$                                                                                                                                                                                                                                                       | $H_0, \text{mM}$ | $B_0, \text{mM}$ | $H_T, \text{mM}$ | $A_T, \text{mM}$ | $E_{g}^0, \text{mV}$ | $E_{b}^0, \text{mV}$ |
|                        | 60.000                                                                                                                                                                                                                                                                   | 10.06            | 1.0599           | 10.010           | 49.99            | 276.25               | -621.03              |
| $V_T, E_h, E_b$        | 0.100, 157.46, -681.1; 0.300, 157.45, -682.5; 0.602, 157.38, -684.6;<br>1.000, 157.29, -687.8; 2.002, 156.81, -698.0; 4.002, 154.02, -721.2;<br>6.000, 149.92, -735.6; 8.012, 145.22, -745.9; 10.004, 140.02, -754.7;<br>14.042, 127.92, -771.6; 20.000, 106.13, -795.6. |                  |                  |                  |                  |                      |                      |
| Titration 3            | $V_0, \text{cm}^3$                                                                                                                                                                                                                                                       | $H_0, \text{mM}$ | $B_0, \text{mM}$ | $H_T, \text{mM}$ | $A_T, \text{mM}$ | $E_{g}^0, \text{mV}$ | $E_{b}^0, \text{mV}$ |
|                        | 60.002                                                                                                                                                                                                                                                                   | 10.0148          | 1.1511           | 10.00            | 50.08            | 275.83               | -622.66              |
| $V_T, E_h, E_b$        | 0.300, 156.91, -683.1; 0.618, 156.84, -685.3; 1.012, 156.71, -688.8;<br>2.028, 156.22, -698.7; 3.048, 155.05, -711.4; 6.020, 149.31, -736.0;<br>15.012, 123.80, -775.6.                                                                                                  |                  |                  |                  |                  |                      |                      |

| 2 M NaClO <sub>4</sub> |                                                                                                                                                                                                                                                                                       |                  |                  |                  |                  |                      |                      |
|------------------------|---------------------------------------------------------------------------------------------------------------------------------------------------------------------------------------------------------------------------------------------------------------------------------------|------------------|------------------|------------------|------------------|----------------------|----------------------|
| Titration 1            | $V_0, \text{cm}^3$                                                                                                                                                                                                                                                                    | $H_0, \text{mM}$ | $B_0, \text{mM}$ | $H_T, \text{mM}$ | $A_T, \text{mM}$ | $E_{g}^0, \text{mV}$ | $E_{b}^0, \text{mV}$ |
|                        | 60.000                                                                                                                                                                                                                                                                                | 10.17            | 1.003            | 10.070           | 10.14            | 197.22               | -705.0               |
| $V_T, E_h, E_b$        | 0.304, 79.16, -761.4; 1.004, 79.14, -762.4; 2.010, 79.12, -763.9;<br>3.008, 79.09, -765.5; 4.008, 79.02, -767.1; 5.028, 78.99, -768.9;<br>7.016, 78.84, -772.6; 9.004, 78.68, -776.8; 12.012, 78.31, -783.6;<br>15.016, 77.68, -790.2; 20.000, 76.42, -799.2; 25.000, 75.35, -805.8.  |                  |                  |                  |                  |                      |                      |
| Titration 2            | $V_0, \text{cm}^3$                                                                                                                                                                                                                                                                    | $H_0, \text{mM}$ | $B_0, \text{mM}$ | $H_T, \text{mM}$ | $A_T, \text{mM}$ | $E_{g}^0, \text{mV}$ | $E_{b}^0, \text{mV}$ |
|                        | 60.000                                                                                                                                                                                                                                                                                | 10.10            | 1.001            | 10.060           | 20.07            | 202.79               | -699.2               |
| $V_T, E_h, E_b$        | 0.518, 84.47, -756.5; 1.006, 84.35, -757.8; 2.002, 84.36, -760.8;<br>3.002, 84.16, -764.2; 4.002, 84.23, -768.0; 6.014, 83.04, -777.8;<br>7.002, 82.80, -782.3; 10.036, 81.01, -794.9; 15.006, 77.63, -808.6;<br>20.000, 74.05, -818.7; 30.014, 66.94, -833.0; 40.000, 60.12, -844.1. |                  |                  |                  |                  |                      |                      |
| Titration 3            | $V_0, \text{cm}^3$                                                                                                                                                                                                                                                                    | $H_0, \text{mM}$ | $B_0, \text{mM}$ | $H_T, \text{mM}$ | $A_T, \text{mM}$ | $E_{g}^0, \text{mV}$ | $E_{b}^0, \text{mV}$ |
|                        | 50.000                                                                                                                                                                                                                                                                                | 8.6825           | 1.0409           | 10.644           | 20.24            | 211.19               | -688.86              |
| $V_T, E_h, E_b$        | 0.300, 89.11, -746.71; 0.644, 89.14, -747.86; 1.008, 89.14, -749.10;<br>3.012, 89.19, -757.16; 6.024, 88.32, -774.46; 10.042, 85.51, -793.80;<br>15.012, 81.38, -807.82; 20.000, 77.17, -817.78.                                                                                      |                  |                  |                  |                  |                      |                      |

| 3 M NaClO <sub>4</sub> |                                                                                                                                                                                                                                                                                                                                                                               |                  |                  |                  |                  |                      |                      |
|------------------------|-------------------------------------------------------------------------------------------------------------------------------------------------------------------------------------------------------------------------------------------------------------------------------------------------------------------------------------------------------------------------------|------------------|------------------|------------------|------------------|----------------------|----------------------|
| Titration 1            | $V_0, \text{cm}^3$                                                                                                                                                                                                                                                                                                                                                            | $H_0, \text{mM}$ | $B_0, \text{mM}$ | $H_T, \text{mM}$ | $A_T, \text{mM}$ | $E_{g}^0, \text{mV}$ | $E_{b}^0, \text{mV}$ |
|                        | 60.000                                                                                                                                                                                                                                                                                                                                                                        | 10.193           | 1.0455           | 10.170           | 10.02            | 293.69               | -603.2               |
| $V_T, E_h, E_b$        | 0.508, 176.46, -663.4; 1.002, 176.55, -664.0; 2.010, 176.66, -665.3;<br>3.014, 176.69, -666.7; 4.008, 176.74, -668.1; 5.032, 176.77, -669.8;<br>6.020, 176.80, -671.4; 8.004, 176.86, -675.0; 10.000, 176.76, -679.1;<br>15.020, 176.22, -690.1; 20.000, 175.35, -699.2; 25.014, 174.20, -706.2;<br>30.018, 173.04, -711.8; 40.000, 170.78, -720.1.                           |                  |                  |                  |                  |                      |                      |
| Titration 2            | $V_0, \text{cm}^3$                                                                                                                                                                                                                                                                                                                                                            | $H_0, \text{mM}$ | $B_0, \text{mM}$ | $H_T, \text{mM}$ | $A_T, \text{mM}$ | $E_{g}^0, \text{mV}$ | $E_{b}^0, \text{mV}$ |
|                        | 60.000                                                                                                                                                                                                                                                                                                                                                                        | 10.2252          | 1.11177          | 10.140           | 15.04            | 299.17               | -598.7               |
| $V_T, E_h, E_b$        | 1.028, 182.16, -659.1; 2.132, 182.06, -661.2; 3.088, 182.03, -663.0;<br>4.006, 181.96, -665.2; 6.092, 181.73, -670.6; 8.002, 181.39, -676.5;<br>10.002, 180.82, -683.4; 12.002, 180.15, -690.1; 15.000, 178.83, -698.6;<br>20.000, 176.65, -708.8; 25.000, 174.35, -716.6; 30.000, 172.09, -722.8;<br>40.000, 167.92, -732.4; 50.046, 163.76, -740.2; 60.000, 160.02, -746.9. |                  |                  |                  |                  |                      |                      |
