# Supplementary figures and images for: Complex formation equilibria in the binary Zn2+–oxalate and In3+–oxalate systems
Source: Royal Society of Chemistry journal article supplement (doi:10.1039/b303202g), 2003-01-01

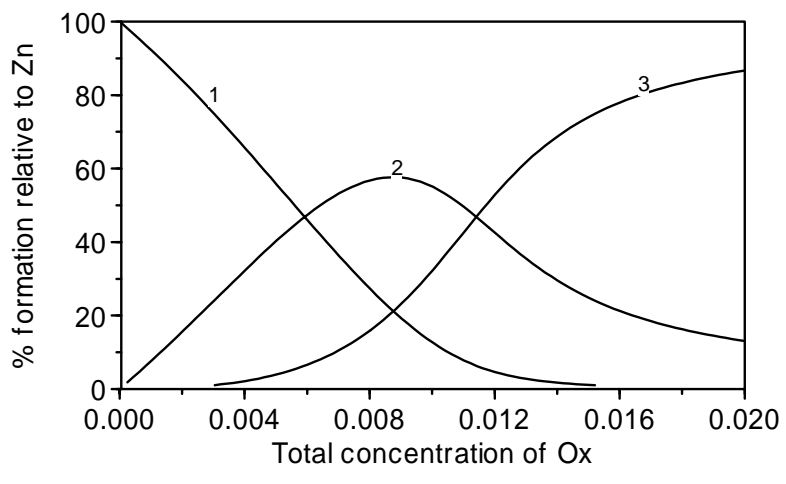

Supplement: b303202g-fs1.pdf [file b303202g-fs1.pdf]

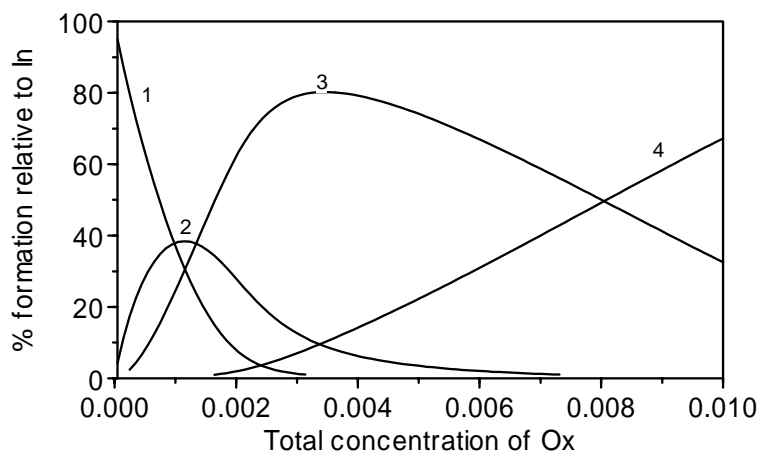

Supplement: b303202g-fs2.pdf [file b303202g-fs2.pdf]

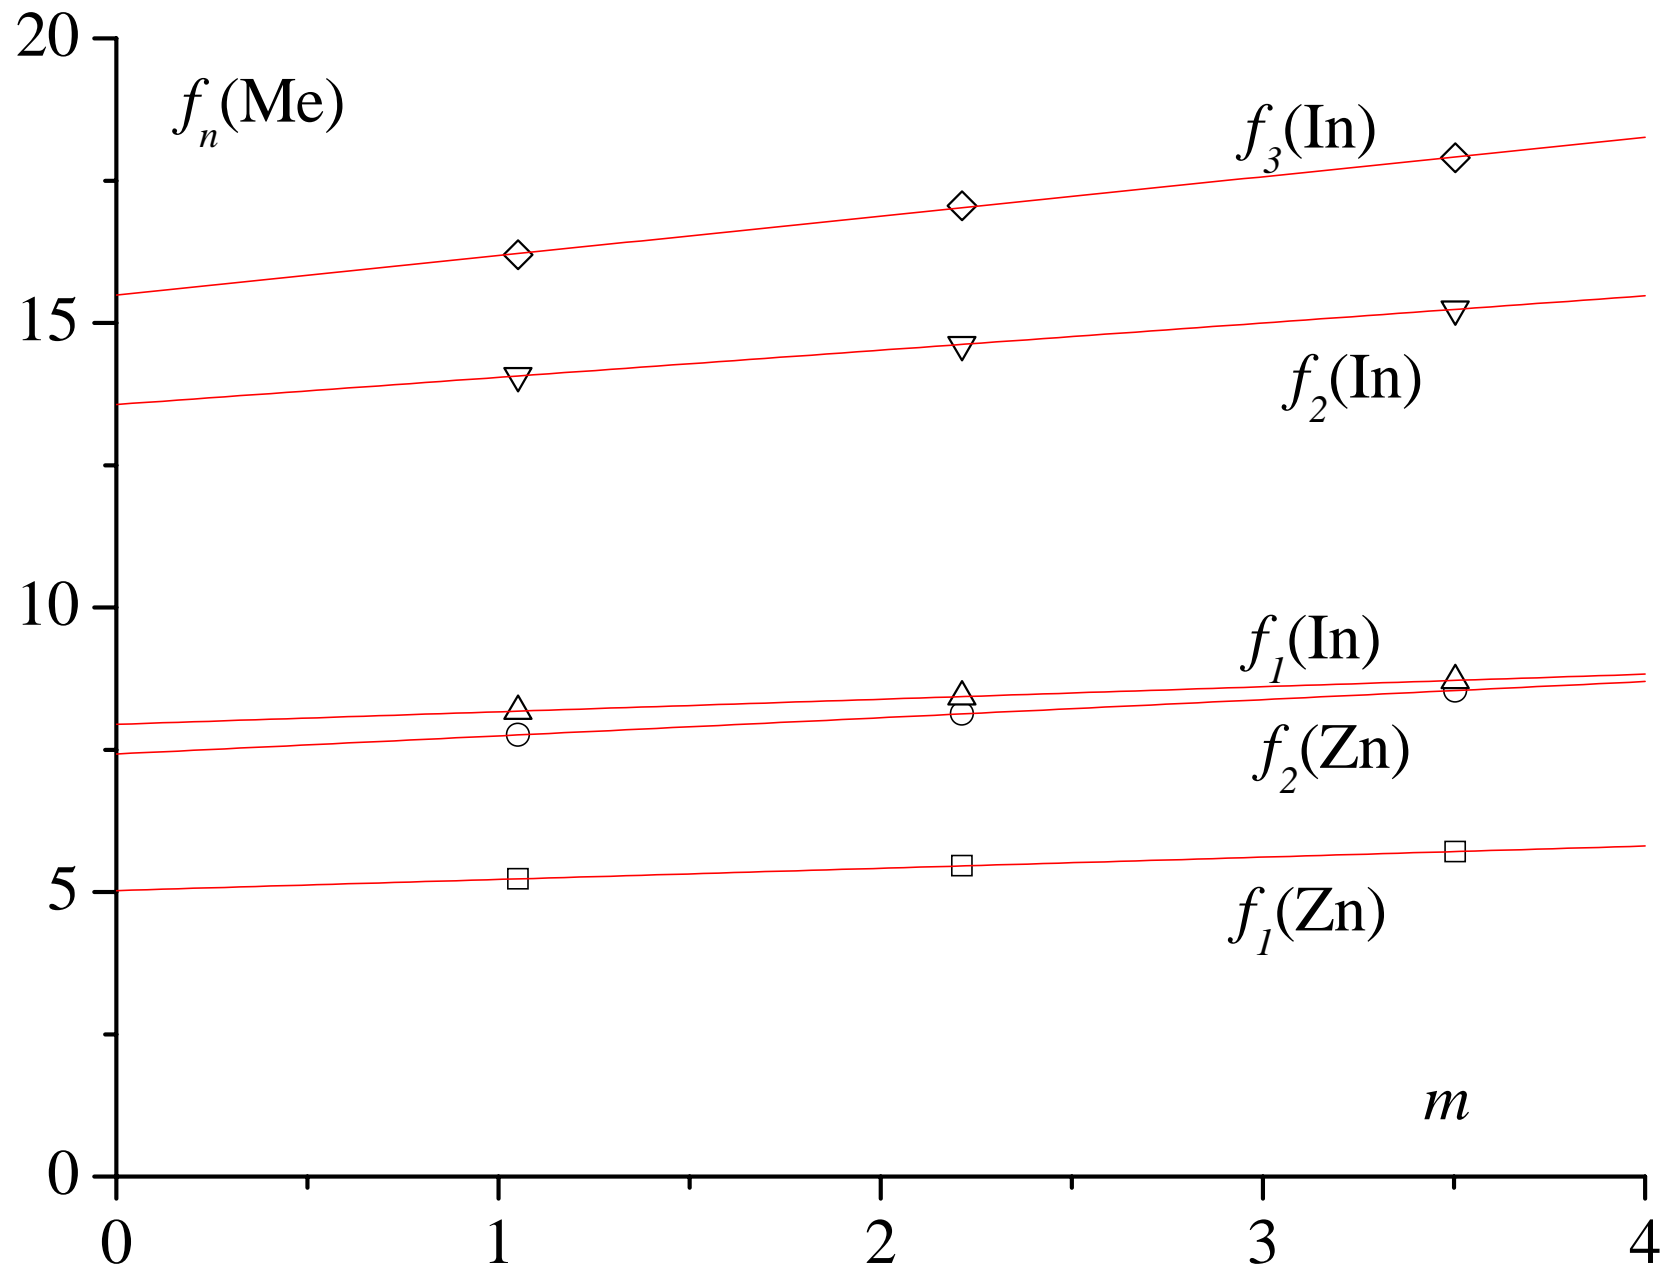

Supplement: b303202g-fs3.pdf [file b303202g-fs3.pdf]

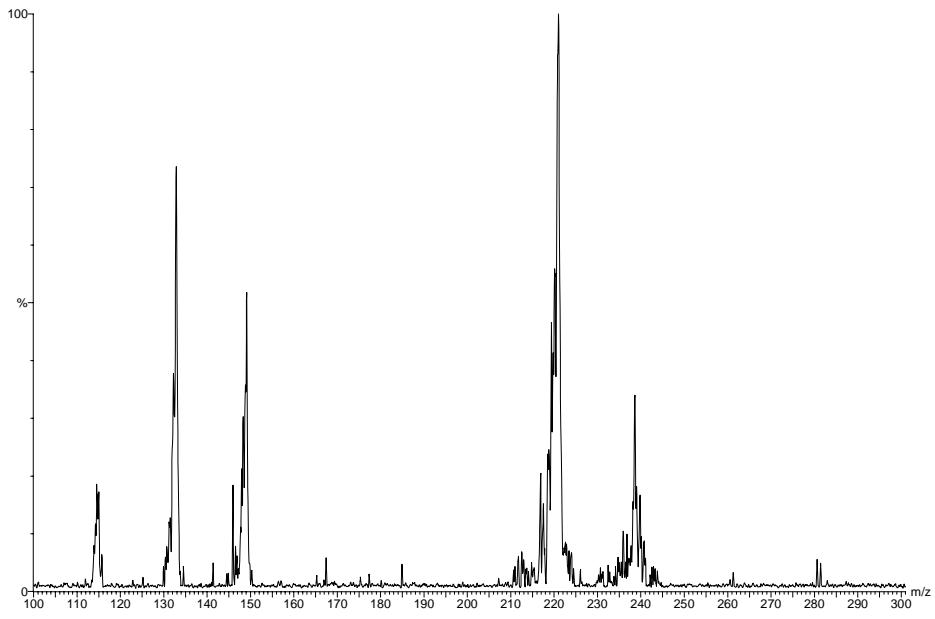

Supplement: b303202g-fs4.pdf [file b303202g-fs4.pdf]

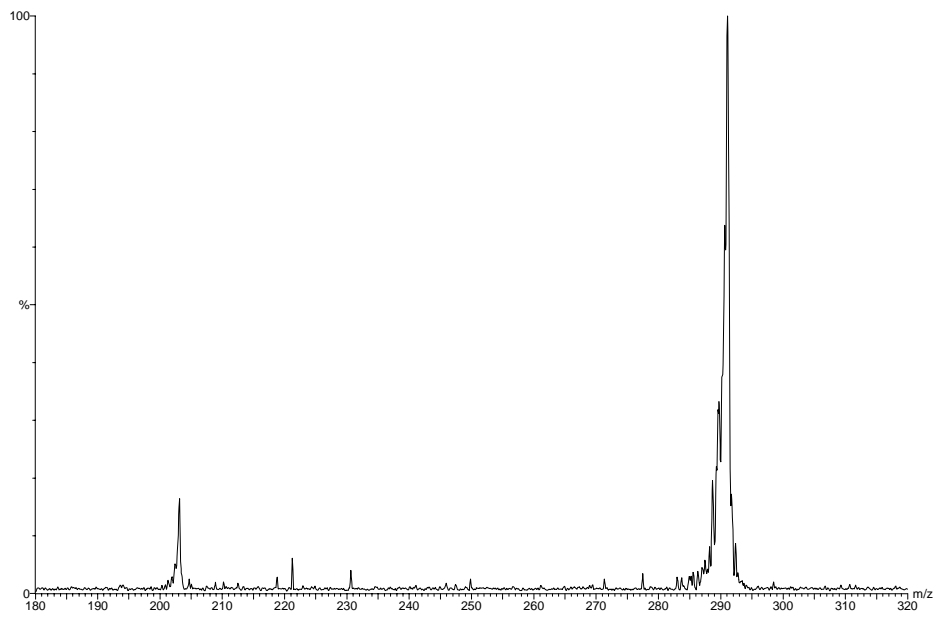

Supplement: b303202g-fs5.pdf [file b303202g-fs5.pdf]
